# Supplementary material for: PRIC295, a Nuclear Receptor Coactivator, Identified from PPAR-Interacting Cofactor Complex
Source: Hindawi journal article supplement (doi:10.1155/2010/173907), 2010-01-01
Supplement: f1 [file 173907.f1.pdf]

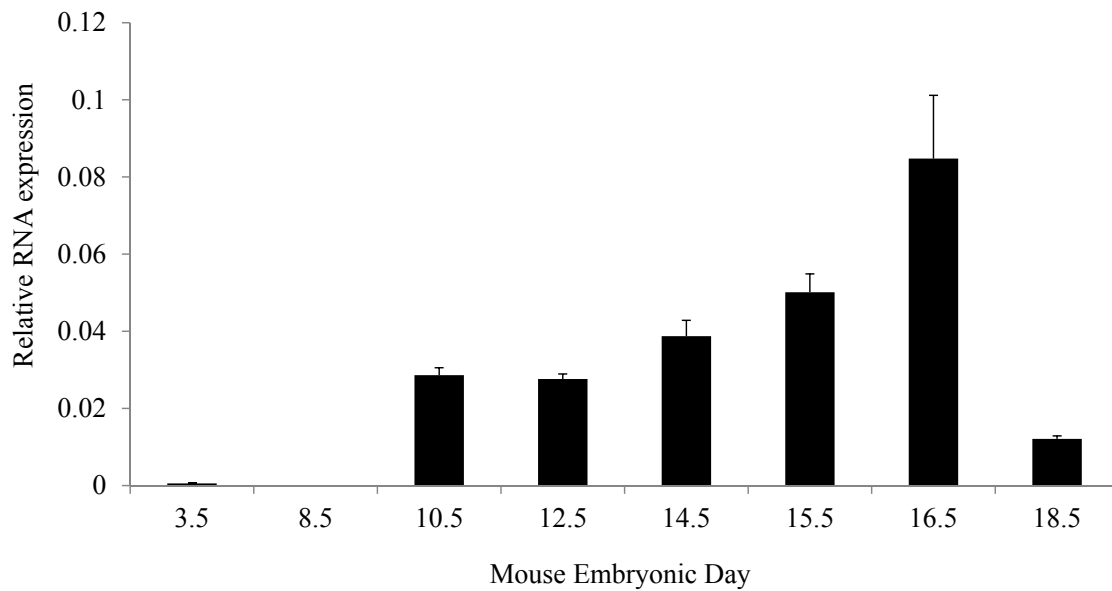

**SUPPLEMENTARY FIGURE 1:** Quantitative PCR data showing the mean expression of PRIC295 RNA during mouse embryonic development at several time points. RNA from 3 whole embryos per time point were prepared and pooled. Samples were run in triplicate to give the measured mean values with standard deviations shown.
