# Supplementary material for: PRIC295, a Nuclear Receptor Coactivator, Identified from PPAR-Interacting Cofactor Complex
Source: Hindawi journal article supplement (doi:10.1155/2010/173907), 2010-01-01
Supplement: f2 [file 173907.f2.pdf]

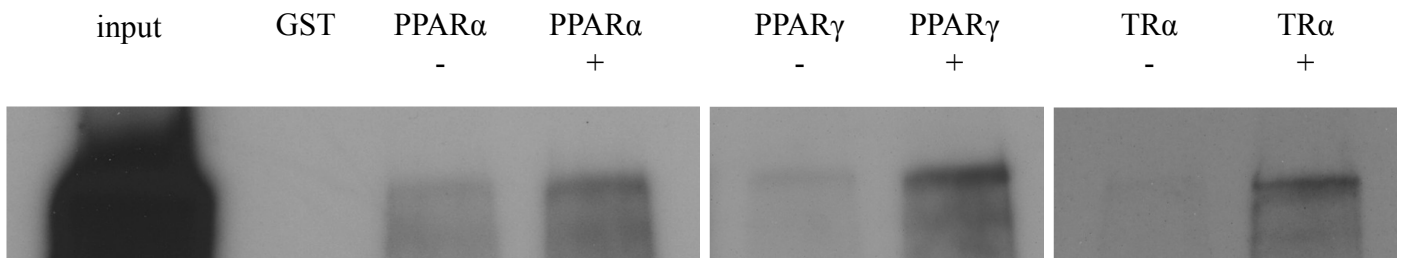

**SUPPLEMENTARY FIGURE 2:** GST-pulldowns conducted using *in vitro*-translated full-length PRIC295 and selected GST-fusion receptor proteins PPAR $\alpha$ , PPAR $\gamma$ , and TR $\alpha$  at a ligand concentration of 10  $\mu$ M. Each receptor shows increased binding interaction with PRIC295 in the presence of ligand. Ligands used were Wy-14,643 for PPAR $\alpha$ , rosiglitazone for PPAR $\gamma$ , and triiodothyronine for TR $\alpha$ . Pulldowns were done in the absence (-) or presence (+) of ligand as indicated.
