# Supplementary material for: PRIC295, a Nuclear Receptor Coactivator, Identified from PPAR-Interacting Cofactor Complex
Source: Hindawi journal article supplement (doi:10.1155/2010/173907), 2010-01-01
Supplement: f3 [file 173907.f3.pdf]

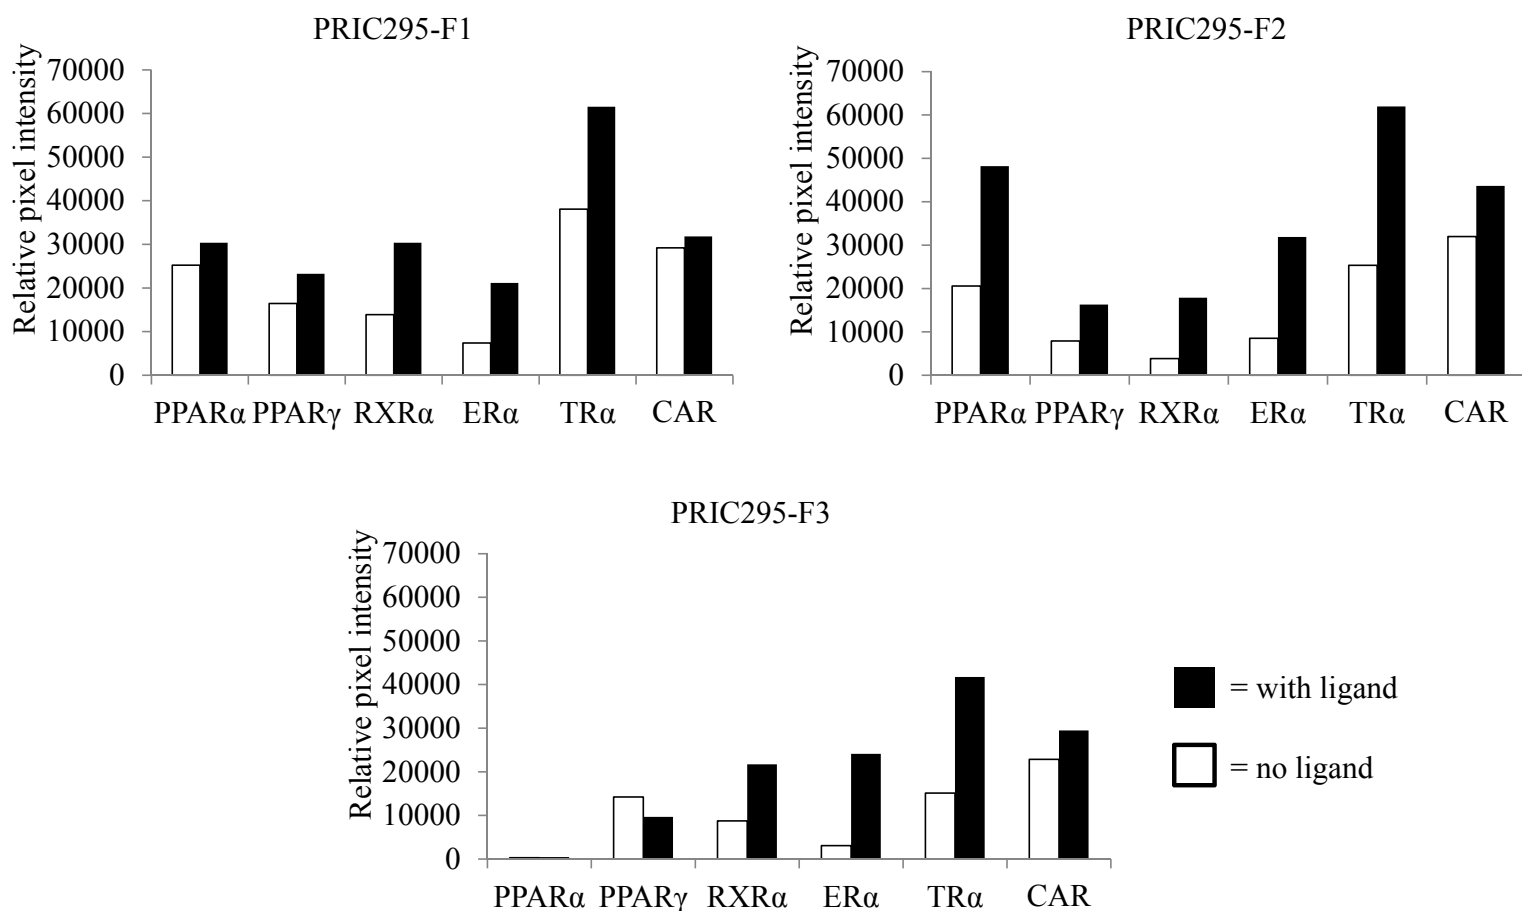

**SUPPLEMENTARY FIGURE3:** Digital image quantification of in vitro binding interaction between radiolabeled PRIC295-F1 ( $\Delta$ PRIC295<sup>1-915</sup>), PRIC295-F2 ( $\Delta$ PRIC295<sup>840-1815</sup>) and PRIC295-F3( $\Delta$ PRIC295<sup>840-1815</sup>) with GST-fusion nuclear receptor proteins as indicated. Open bars indicate interaction in the absence of ligand. Dark bars indicate interaction in the presence of receptor-specific ligand. Individual ligands used are as previously described
