# Supplementary material for: PRIC295, a Nuclear Receptor Coactivator, Identified from PPAR-Interacting Cofactor Complex
Source: Hindawi journal article supplement (doi:10.1155/2010/173907), 2010-01-01
Supplement: f4 [file 173907.f4.pdf]

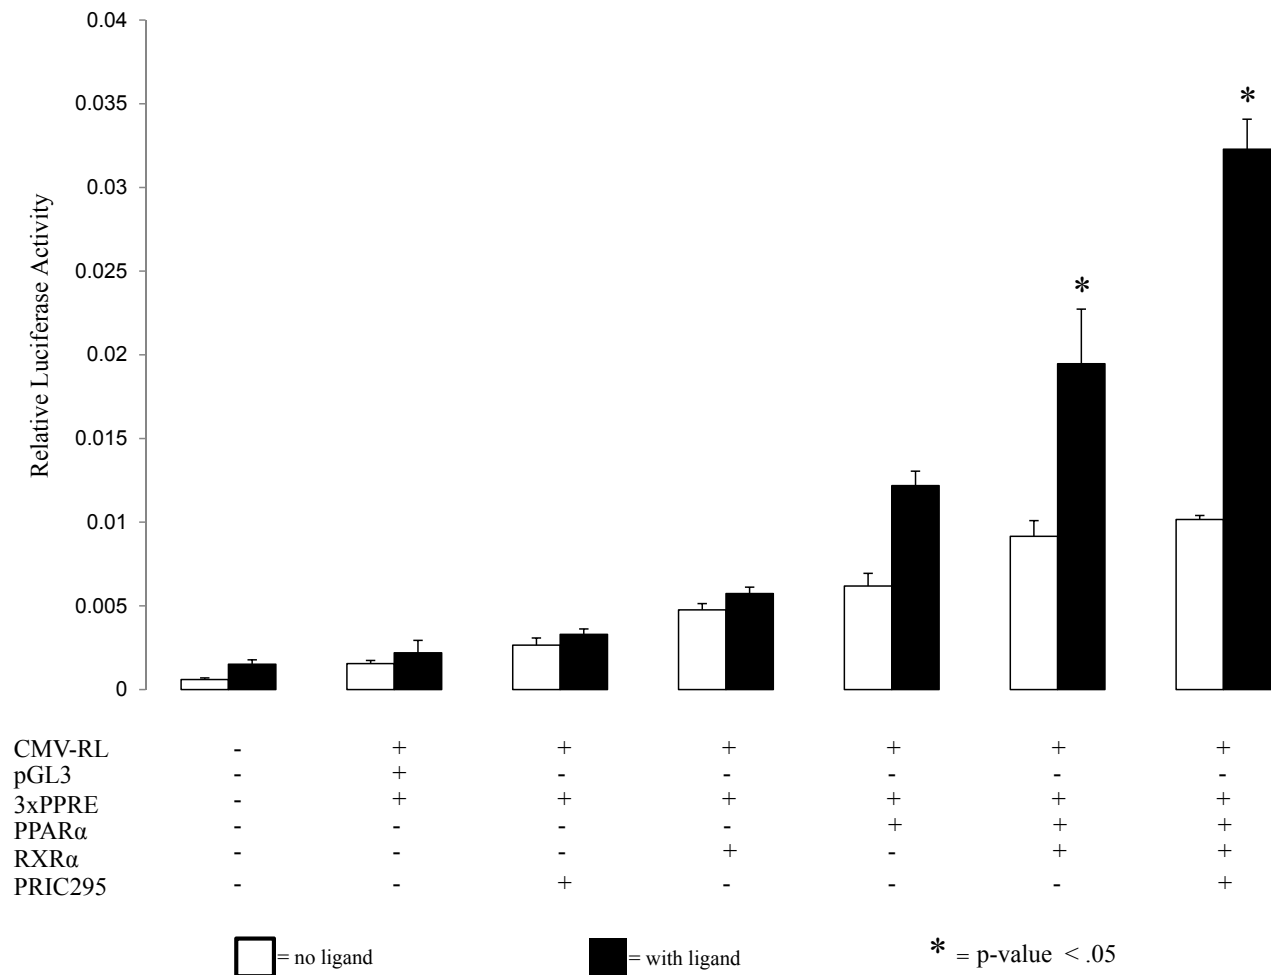

**SUPPLEMENTARY FIGURE 4:** PRIC295 functions as a transcriptional coactivator for heterodimer partner RXR $\alpha$ . HeLa cells were transfected with 100 ng each of pcDNA-PRIC295, pCMX-PPAR $\alpha$ , pCMX-RXR $\alpha$  and pGL3-3xPPRE and 50 ng of CMV-RL as indicated (- or +). Each column represents the mean relative luciferase unit value of experiments conducted in triplicate. Open bars represent activity in the absence of ligand and dark bars represent activity in the presence of the RXR $\alpha$  ligand, 9-cis-retinoic acid. Values were normalized against the expression of *Renilla* under the control of the CMV promoter. Statistical significance was tested using a one-tailed student's t-test by comparing transfected groups marked with an \*.
