# Supplementary material for: PRIC295, a Nuclear Receptor Coactivator, Identified from PPAR-Interacting Cofactor Complex
Source: Hindawi journal article supplement (doi:10.1155/2010/173907), 2010-01-01
Supplement: f6 [file 173907.f6.pdf]

**SUPPLEMENTARY TABLE 1:** A list of HEAT repeat locations within the PRIC295 protein according to their initial and ending amino acid residues.

| <b>Repeat</b>   | <b>Location (aa)</b> |
|-----------------|----------------------|
| H <sub>1</sub>  | 257-294              |
| H <sub>2</sub>  | 295-331              |
| H <sub>3</sub>  | 460-503              |
| H <sub>4</sub>  | 1078-1115            |
| H <sub>5</sub>  | 1290-1332            |
| H <sub>6</sub>  | 1335-1372            |
| H <sub>7</sub>  | 1455-1492            |
| H <sub>8</sub>  | 1493-1530            |
| H <sub>9</sub>  | 1534-1571            |
| H <sub>10</sub> | 1573-1609            |
| H <sub>11</sub> | 1611-1648            |
| H <sub>12</sub> | 1653-1690            |
| H <sub>13</sub> | 1773-1810            |
| H <sub>14</sub> | 1812-1848            |
| H <sub>15</sub> | 1921-1958            |
| H <sub>16</sub> | 1959-1996            |
| H <sub>17</sub> | 2001-2038            |
| H <sub>18</sub> | 2039-2076            |
| H <sub>19</sub> | 2188-2225            |
| H <sub>20</sub> | 2259-2296            |
| H <sub>21</sub> | 2339-2380            |
| H <sub>22</sub> | 2422-2459            |
| H <sub>23</sub> | 2560-2583            |
| H <sub>24</sub> | 2588-2625            |
